# Supplementary material for: Gastric Helicobacter pylori infection perturbs human oral microbiota
Source: PeerJ. 2019 Jan 28;7:e6336. doi: 10.7717/peerj.6336 (PMC6354663; doi:10.7717/peerj.6336)
Supplement: Table S1 [file peerj-07-6336-s001.xlsx]

## Sheet: Sheet1
SRA accession	Study prticipant number	Sample collection time	Urea breath test status	Age	Age group	Gender	Nationality
SRR6315501	1	Evening before brushing teeth	Negative	30	30-39	Female	Indonesian
SRR6315502	1	Morning before brushing teeth	Negative	30	30-39	Female	Indonesian
SRR6315503	2	Evening before brushing teeth	Negative	34	30-39	Female	Indonesian
SRR6315504	2	Morning before brushing teeth	Negative	34	30-39	Female	Indonesian
SRR6315528	3	Evening before brushing teeth	Negative	33	30-39	Male	Indonesian
SRR6315506	3	Morning before brushing teeth	Negative	33	30-39	Male	Indonesian
SRR6315507	4	Evening before brushing teeth	Negative	24	20-29	Male	Malaysian
SRR6315508	4	Morning before brushing teeth	Negative	24	20-29	Male	Malaysian
SRR6315509	5	Evening before brushing teeth	Positive	24	20-29	Female	Singaporean
SRR6315510	5	Morning before brushing teeth	Positive	24	20-29	Female	Singaporean
SRR6315516	9	Evening before brushing teeth	Negative	34	30-39	Male	Cambodian
SRR6315517	9	Morning before brushing teeth	Negative	34	30-39	Male	Cambodian
SRR6315518	11	Evening before brushing teeth	Negative	26	20-29	Female	British
SRR6315519	11	Morning before brushing teeth	Negative	26	20-29	Female	British
SRR6315512	15	Evening before brushing teeth	Negative	43	40 & above	Male	Singaporean
SRR6315513	15	Morning before brushing teeth	Negative	43	40 & above	Male	Singaporean
SRR6315514	18	Evening before brushing teeth	Positive	58	40 & above	Female	Malaysian
SRR6315515	18	Morning before brushing teeth	Positive	58	40 & above	Female	Malaysian
SRR6315522	20	Evening before brushing teeth	Negative	35	30-39	Male	Malaysian
SRR6315523	20	Morning before brushing teeth	Negative	35	30-39	Male	Malaysian
SRR6315531	21	Evening before brushing teeth	Negative	21	20-29	Female	Australian
SRR6315530	21	Morning before brushing teeth	Negative	21	20-29	Female	Australian
SRR6315533	22	Evening before brushing teeth	Positive	34	30-39	Female	Australian
SRR6315532	22	Morning before brushing teeth	Positive	34	30-39	Female	Australian
SRR6315535	26	Evening before brushing teeth	Positive	23	20-29	Male	Australian
SRR6315534	26	Morning before brushing teeth	Positive	23	20-29	Male	Australian
SRR6315537	27	Evening before brushing teeth	Negative	32	30-39	Male	Ecuadorian
SRR6315536	27	Morning before brushing teeth	Negative	32	30-39	Male	Ecuadorian
SRR6315539	28	Evening before brushing teeth	Positive	29	20-29	Male	Peruvian
SRR6315538	28	Morning before brushing teeth	Positive	29	20-29	Male	Peruvian
SRR6315525	29	Evening before brushing teeth	Negative	27	20-29	Female	Australian
SRR6315524	29	Morning before brushing teeth	Negative	27	20-29	Female	Australian
SRR6315505	30	Evening before brushing teeth	Negative	23	20-29	Male	Singaporean
SRR6315511	30	Morning before brushing teeth	Negative	23	20-29	Male	Singaporean
SRR6315526	32	Evening before brushing teeth	Negative	27	20-29	Male	Chinese
SRR6315527	32	Morning before brushing teeth	Negative	27	20-29	Male	Chinese
SRR6315529	37	Evening before brushing teeth	Positive	33	30-39	Male	Australian
SRR6315540	37	Morning before brushing teeth	Positive	33	30-39	Male	Australian
SRR6315520	38	Evening before brushing teeth	Negative	23	20-29	Male	Chinese
SRR6315521	38	Morning before brushing teeth	Negative	23	20-29	Male	Chinese
SRR6315500	39	Evening before brushing teeth	Positive	50	40 & above	Male	Malaysian
SRR6315499	39	Morning before brushing teeth	Positive	50	40 & above	Male	Malaysian
SRR6315498	40	Evening before brushing teeth	Positive	23	20-29	Male	Indonesian
SRR6315497	40	Morning before brushing teeth	Positive	23	20-29	Male	Indonesian
SRR6315496	41	Evening before brushing teeth	Positive	30	30-39	Female	Kenyan
SRR6315495	41	Morning before brushing teeth	Positive	30	30-39	Female	Kenyan
SRR6315494	46	Evening before brushing teeth	Positive	34	30-39	Female	Australian
SRR6315493	46	Morning before brushing teeth	Positive	34	30-39	Female	Australian
